# Supplementary material for: Evolutionary dynamics of the human pseudoautosomal regions
Source: PubMed Central journal article supplement (PMC8084340; doi:10.1371/journal.pgen.1009532), 2021-04-19
Supplement: pgen.1009532.s001.pdf [file pgen.1009532.s001.pdf]

**PAR1**

| <b>Gene/pseudogene</b> | <b>Initial bp position</b> | <b>Final bp position</b> |
|------------------------|----------------------------|--------------------------|
| LLOYNC03-29C1.1        | 253743                     | 255091                   |
| PLCXD1                 | 276322                     | 303356                   |
| GTPBP6                 | 304529                     | 318787                   |
| LINC00685              | 320990                     | 321851                   |
| PPP2R3B                | 333963                     | 386955                   |
| FABP5P13               | 523775                     | 524102                   |
| KRT18P53               | 545236                     | 545352                   |
| SHOX                   | 624344                     | 659411                   |
| RP11-309M23.1          | 990221                     | 994365                   |
| RPL14P5                | 1008503                    | 1010101                  |
| CRLF2                  | 1187549                    | 1212723                  |
| CSF2RA                 | 1268800                    | 1310381                  |
| IL3RA                  | 1336616                    | 1382689                  |
| ASMTL                  | 1403139                    | 1453762                  |
| P2RY8                  | 1462572                    | 1537107                  |
| AKAP17A                | 1591593                    | 1602514                  |
| ASMT                   | 1615001                    | 1643081                  |
| RP13-297E16.4          | 1732584                    | 1755985                  |
| RP13-297E16.5          | 1767347                    | 1768776                  |
| DHRX                   | 2219516                    | 2502805                  |
| ZBED1                  | 2486414                    | 2500967                  |
| CD99P1                 | 2609348                    | 2657229                  |
| CD99                   | 2691179                    | 2741309                  |
| XG                     | 2752050                    | 2815927                  |

**PAR2**

| <b>Gene/pseudogene</b> | <b>Initial bp position</b> | <b>Final bp position</b> |
|------------------------|----------------------------|--------------------------|
| SPRY3                  | 155767812                  | 155782459                |
| AMDP1                  | 155828585                  | 155829576                |
| DPH3P2                 | 155875636                  | 155875885                |
| VAMP7                  | 155881293                  | 155943769                |
| TCEB1P24               | 155978992                  | 155979325                |
| IL9R                   | 155997581                  | 156010817                |
| WASH6P                 | 156020826                  | 156025710                |
