# Supplementary material for: Evolutionary dynamics of the human pseudoautosomal regions
Source: PubMed Central journal article supplement (PMC8084340; doi:10.1371/journal.pgen.1009532), 2021-04-19
Supplement: pgen.1009532.s002.pdf [file pgen.1009532.s002.pdf]

| N° of markers | PAR1           |        | N° of markers | PAR2           |        | Samples                         | Reference       | Ratio:<br>male(PAR1)/<br>female(PAR1) | Ratio:<br>male(PAR1)/<br>male(PAR2) |
|---------------|----------------|--------|---------------|----------------|--------|---------------------------------|-----------------|---------------------------------------|-------------------------------------|
|               | Recombination* |        |               | Recombination* |        |                                 |                 |                                       |                                     |
|               | Male           | Female |               | Male           | Female |                                 |                 |                                       |                                     |
| 3             | 50             | 4      | -             | -              | -      | 8 CEPH families                 | [1]             | 13                                    | -                                   |
| 5             | 49.9           | 4.18   | -             | -              | -      | 44 CEPH families                | [2]             | 12                                    | -                                   |
| 11            | 49             | 4      | -             | -              | -      | 38 CEPH families                | [3]             | 12                                    | -                                   |
| 6             | 11.7           | .8     | -             | -              | -      | 40 CEPH and 146 deCODE families | [4]             | 15                                    | -                                   |
| 1400          | 38             | 3.8    | 140           | 0.7            | 0      | 269 unrelated individuals       | [5]             | 10                                    | 54                                  |
| 23            | 55             | 6      | 6             | 1              | 0      | 28 CEPH pedigrees               | [6]             | 9                                     | 55                                  |
| 9             | 55.3           | -      | 1             | 0.7            | -      | 4 sperm donors                  | [7]             | -                                     | 79                                  |
| 12904         | 472.1**        | 55.2** | 634           | 6.5**          | 0**    | 180 unrelated individuals       | Present study** | 9                                     | 73                                  |

\*Recombination in cM units, except for our results\*\* that are present in  $\rho$  cumulative.

\*\*Results from our analysis

**Note:** Data from references 1,2,3,4,5 and 7 were retrieved from the table 1 of: “Flaquer A, Rappold GA, Wienker TF, Fischer C. The human pseudoautosomal regions: a review for genetic epidemiologists. *Eur J Hum Genet.* 2008;16: 771-779”.

#### References:

1. Rouyer F, Simmler MC, Johnsson C, Vergnaud G, Cooke HJ, Weissenbach J. A gradient of sex linkage in the pseudoautosomal region of the human sex chromosomes. *Nature.* 1986;319: 291–296.
2. Page DC, Bieker K, Brown LG, Hinton S, Leppert M, Lalouel JM, et al. Linkage, physical mapping, and DNA sequence analysis of pseudoautosomal loci on the human X and Y chromosomes. *Genomics.* 1987;1: 243–256.
3. Henke A, Fischer C, Rappold GA. Genetic map of the human pseudoautosomal region reveals a high rate of recombination in female meiosis at the Xp telomere. *Genomics.* 1993;18: 478–485.
4. Kong X, Murphy K, Raj T, He C, White PS, Matisse TC. A combined linkage – physical map of the human genome. *Am J Hum Genet.* 2004;75: 114–1148.
5. Consortium IH: A haplotype map of the human genome. *Nature.* 2005;437: 1299–1320.
6. Flaquer A, Fischer C, Wienker TF. A new sex-specific genetic map of the human pseudoautosomal regions (PAR1 and PAR2). *Hum Hered.* 2009;68(3): 192-200.
7. Lien S, Szyda J, Schechinger B, Rappold G, Arnheim N. Evidence for heterogeneity in recombination in the human pseudoautosomal region: high resolution analysis by sperm typing and radiation-hybrid mapping. *Am J Hum Genet.* 2000;66: 557–566.
