# Supplementary material for: Evolutionary dynamics of the human pseudoautosomal regions
Source: PubMed Central journal article supplement (PMC8084340; doi:10.1371/journal.pgen.1009532), 2021-04-19
Supplement: pgen.1009532.s003.pdf [file pgen.1009532.s003.pdf]

|                   | <b>Initial number of variants/markers in 1000 genomes project</b> | <b>Final number of markers after quality control</b> | <b>Final number of markers per base-pair</b> |
|-------------------|-------------------------------------------------------------------|------------------------------------------------------|----------------------------------------------|
| <b>PAR1</b>       | 100714                                                            | 12904                                                | 1 SNP per 215 bp                             |
| <b>PAR2</b>       | 9849                                                              | 634                                                  | 1 SNP per 520 bp                             |
| <b>X-specific</b> | 3357530                                                           | 224640                                               | 1 SNP per 681 bp                             |
| <b>Y-specific</b> | 62042                                                             | 1483                                                 | 1 SNP per 36484 bp                           |
