# Supplementary material for: Evolutionary dynamics of the human pseudoautosomal regions
Source: PubMed Central journal article supplement (PMC8084340; doi:10.1371/journal.pgen.1009532), 2021-04-19
Supplement: pgen.1009532.s004.pdf [file pgen.1009532.s004.pdf]

|                               |                                                                                                                                                                                                                                                                                                     |
|-------------------------------|-----------------------------------------------------------------------------------------------------------------------------------------------------------------------------------------------------------------------------------------------------------------------------------------------------|
| <b>AFR – Africans</b>         | <p>YRI – Yoruba in Ibadan, Nigeria</p> <p>LWK – Luhya in Webuye, Kenya</p> <p>GWD – Gambian in Western Divisions in the Gambia</p> <p>MSL – Mende in Sierra Leone</p> <p>ESN – Esan in Nigeria</p> <p>ASW – Americans of African Ancestry in SW USA</p> <p>ACB – African Caribbeans in Barbados</p> |
| <b>EUR– Europeans</b>         | <p>CEU – Utah Residents (CEPH) with Northern and Western European Ancestry</p> <p>TSI – Toscani in Italia</p> <p>FIN – Finnish in Finland</p> <p>GBR – British in England and Scotland</p> <p>IBS – Iberian Population in Spain</p>                                                                 |
| <b>SAS – South Asians</b>     | <p>GIH – Gujarati Indian from Houston, Texas</p> <p>PJL – Punjabi from Lahore, Pakistan</p> <p>BEB – Bengali from Bangladesh</p> <p>STU – Sri Lankan Tamil from the UK</p> <p>ITU – Indian Telugu from the UK</p>                                                                                   |
| <b>EAS – East Asians</b>      | <p>CHB – Han Chinese in Beijing, China</p> <p>JPT – Japanese in Tokyo, Japan</p> <p>CHS – Southern Han Chinese</p> <p>CDX – Chinese Dai in Xishuangbanna, China</p> <p>KHV – Kinh in Ho Chi Minh City, Vietnam</p>                                                                                  |
| <b>AMR – Admixed American</b> | <p>MXL – Mexican Ancestry from Los Angeles USA</p> <p>PUR – Puerto Ricans from Puerto Rico</p> <p>CLM – Colombians from Medellin, Colombia</p> <p>PEL – Peruvians from Lima, Peru</p>                                                                                                               |
