# Supplementary material for: Evolutionary dynamics of the human pseudoautosomal regions
Source: PubMed Central journal article supplement (PMC8084340; doi:10.1371/journal.pgen.1009532), 2021-04-19
Supplement: pgen.1009532.s005.pdf [file pgen.1009532.s005.pdf]

|          | AFR | EUR | EAS | SAS | AMR |
|----------|-----|-----|-----|-----|-----|
| X-female | 342 | 263 | 260 | 229 | 177 |
| X-male   | 319 | 240 | 244 | 260 | 170 |
| Y-male*  | 319 | 240 | 244 | 260 | 170 |

\*Information of the Y chromosome for the male individuals.
