# Supplementary material for: Evolutionary dynamics of the human pseudoautosomal regions
Source: PubMed Central journal article supplement (PMC8084340; doi:10.1371/journal.pgen.1009532), 2021-04-19

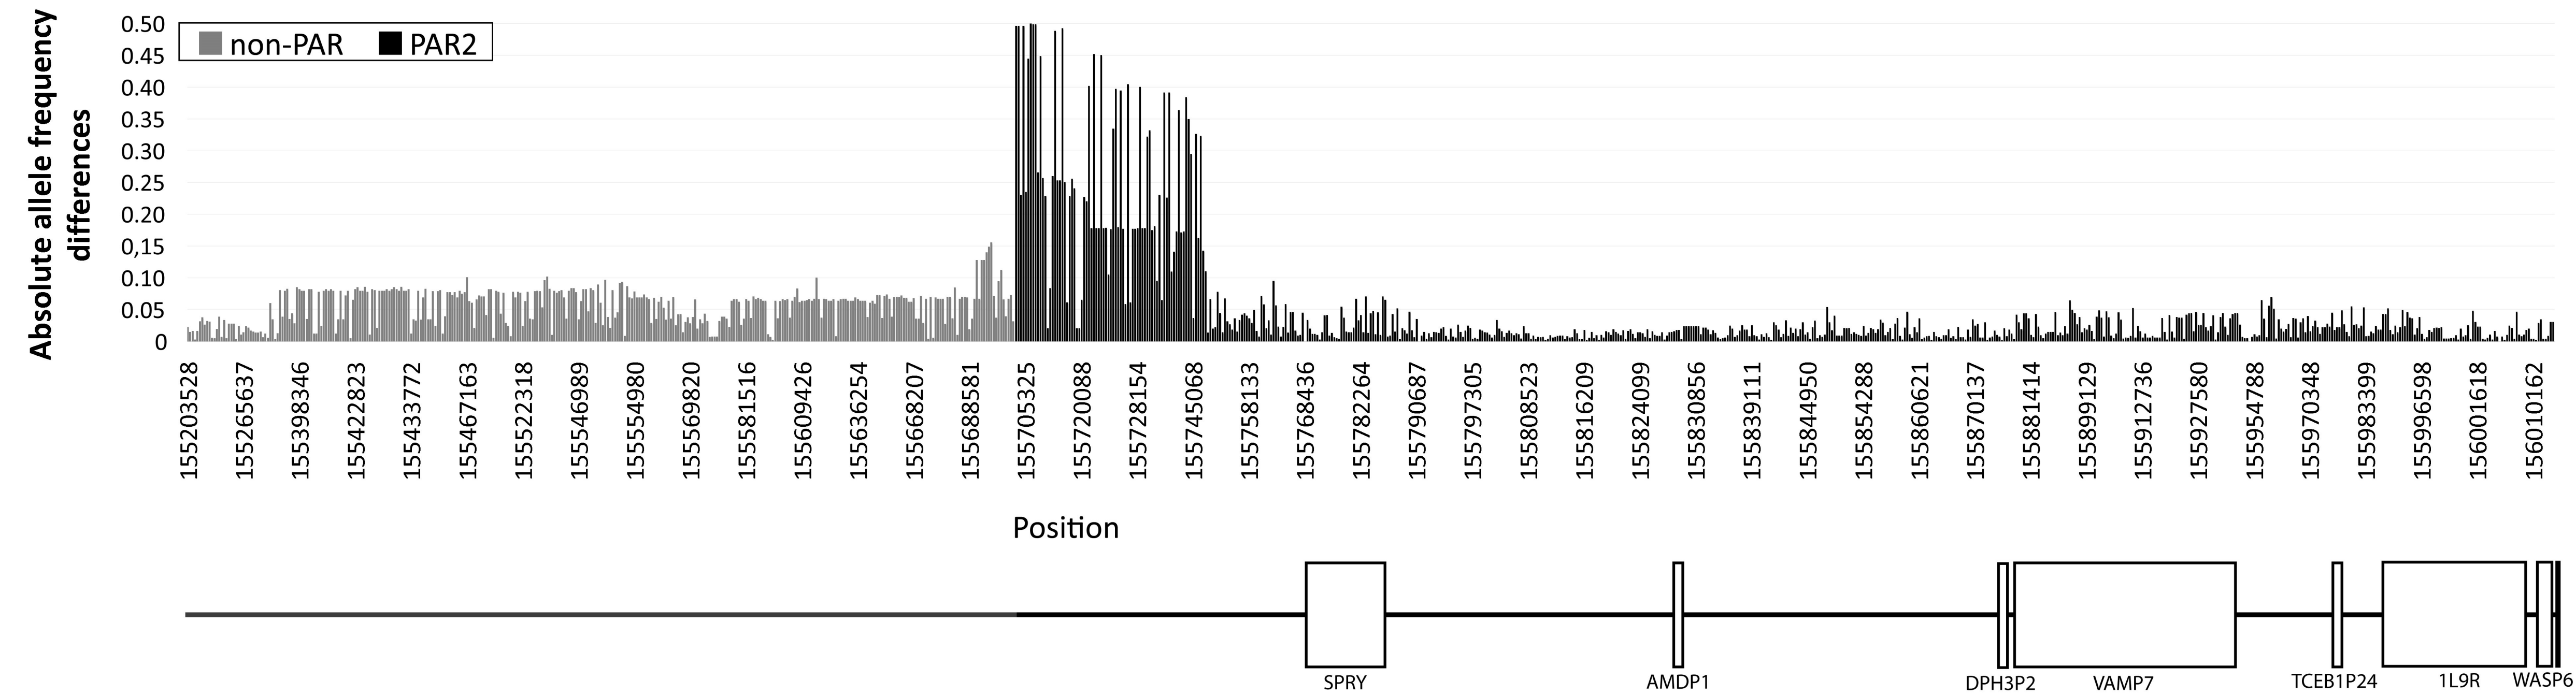

Supplement: pgen.1009532.s007.pdf [file pgen.1009532.s007.pdf]
