# Supplementary material for: Evolutionary dynamics of the human pseudoautosomal regions
Source: PubMed Central journal article supplement (PMC8084340; doi:10.1371/journal.pgen.1009532), 2021-04-19
Supplement: pgen.1009532.s013.pdf [file pgen.1009532.s013.pdf]

CD99

XG

SPRY

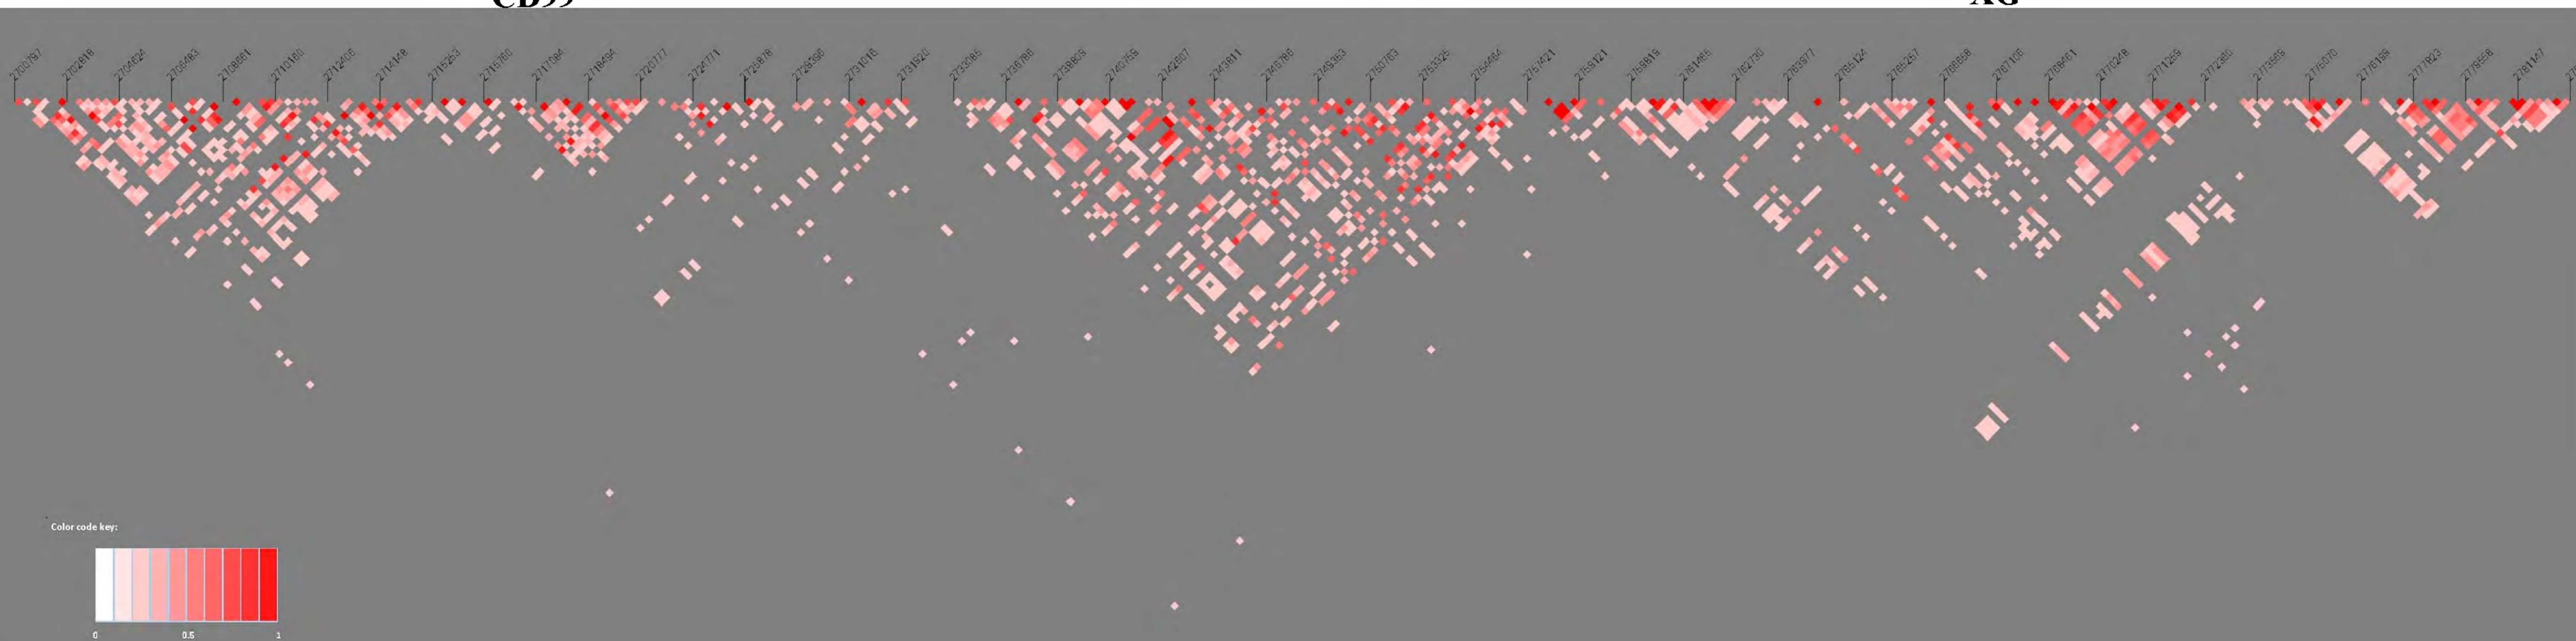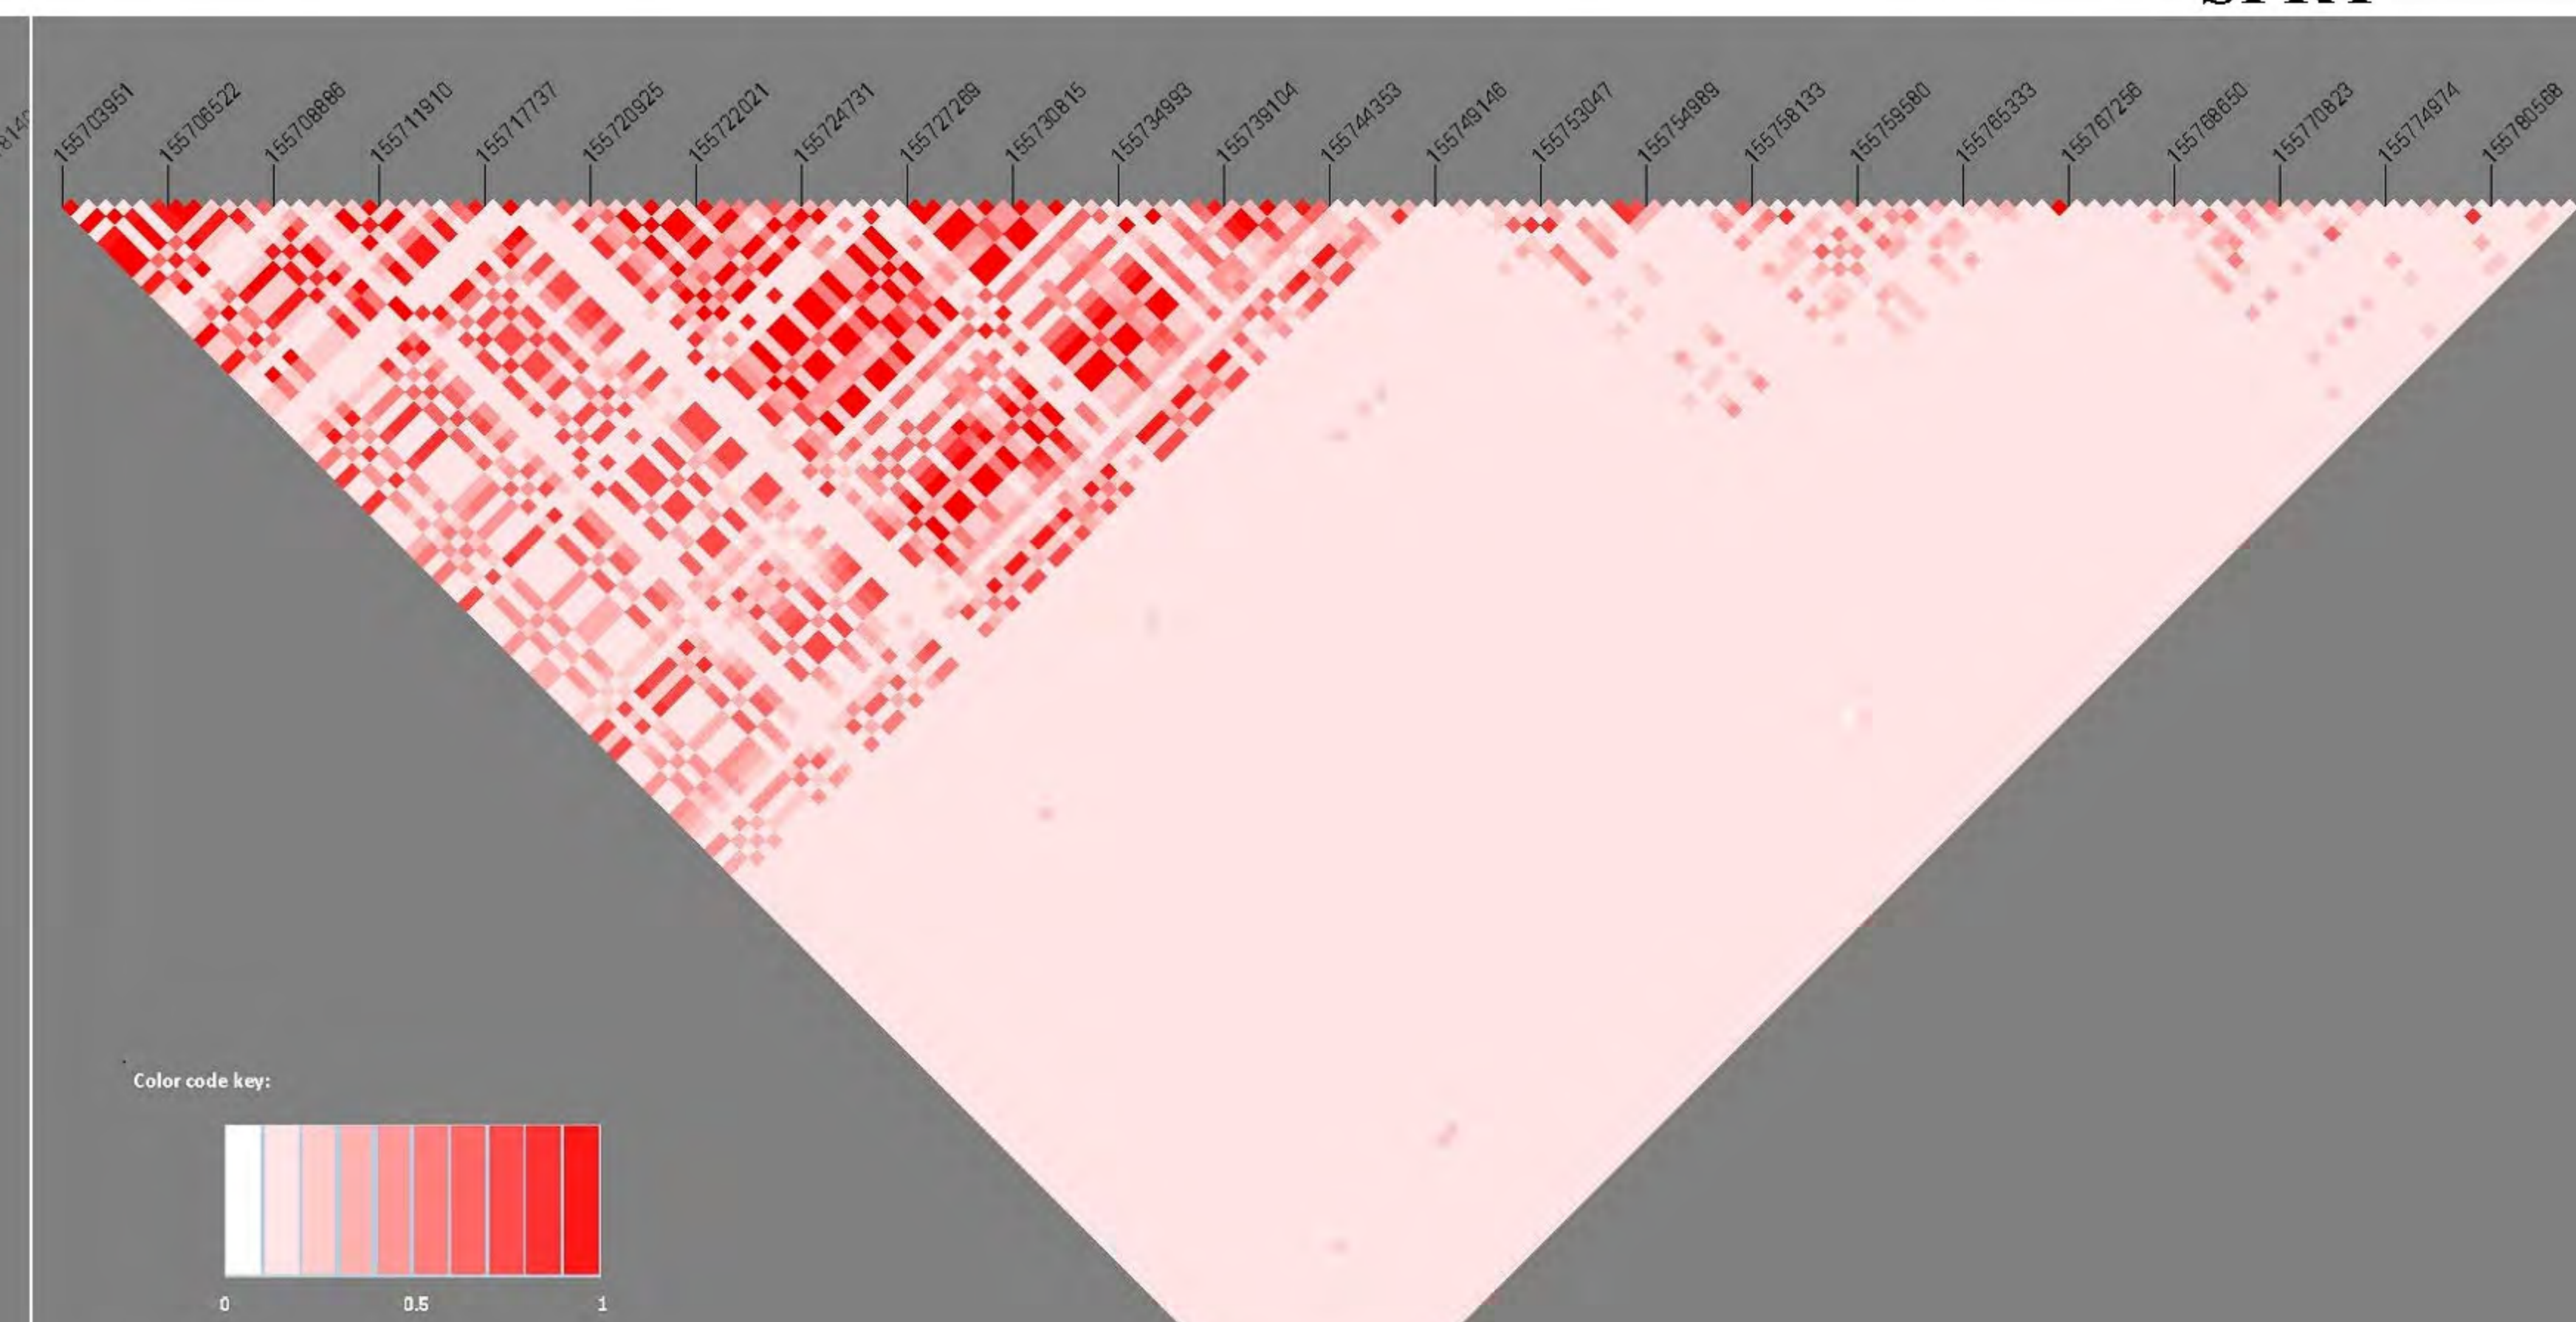

(A1) X chromosome: PAR1

(A2) X chromosome: PAR2

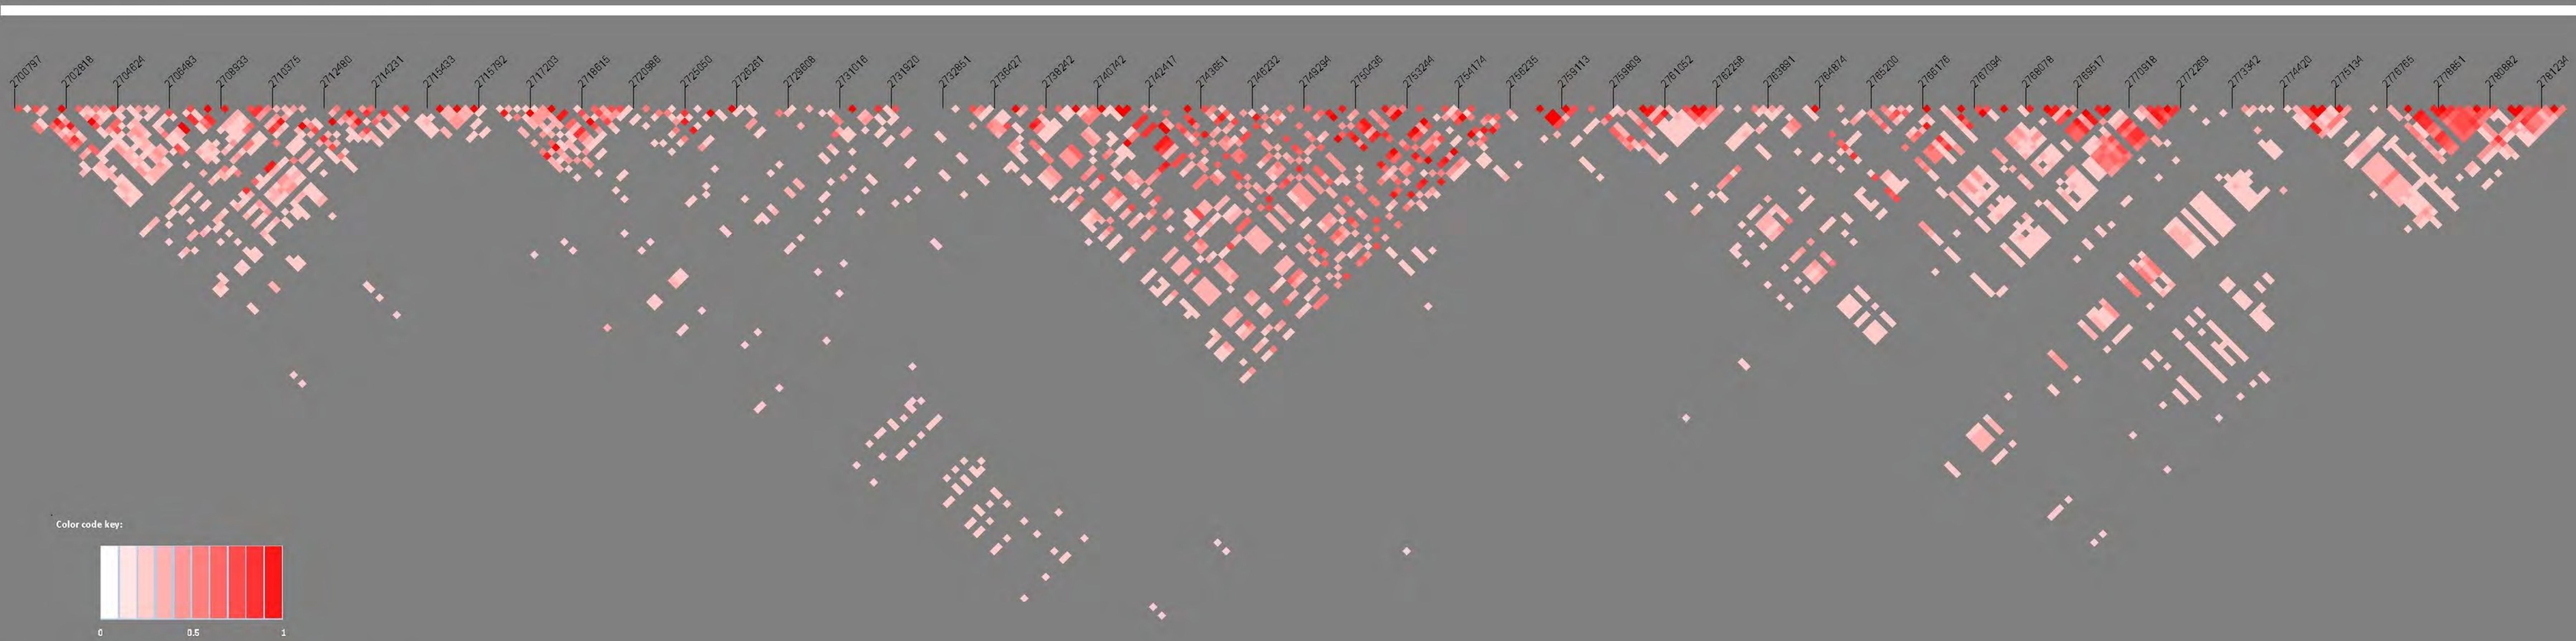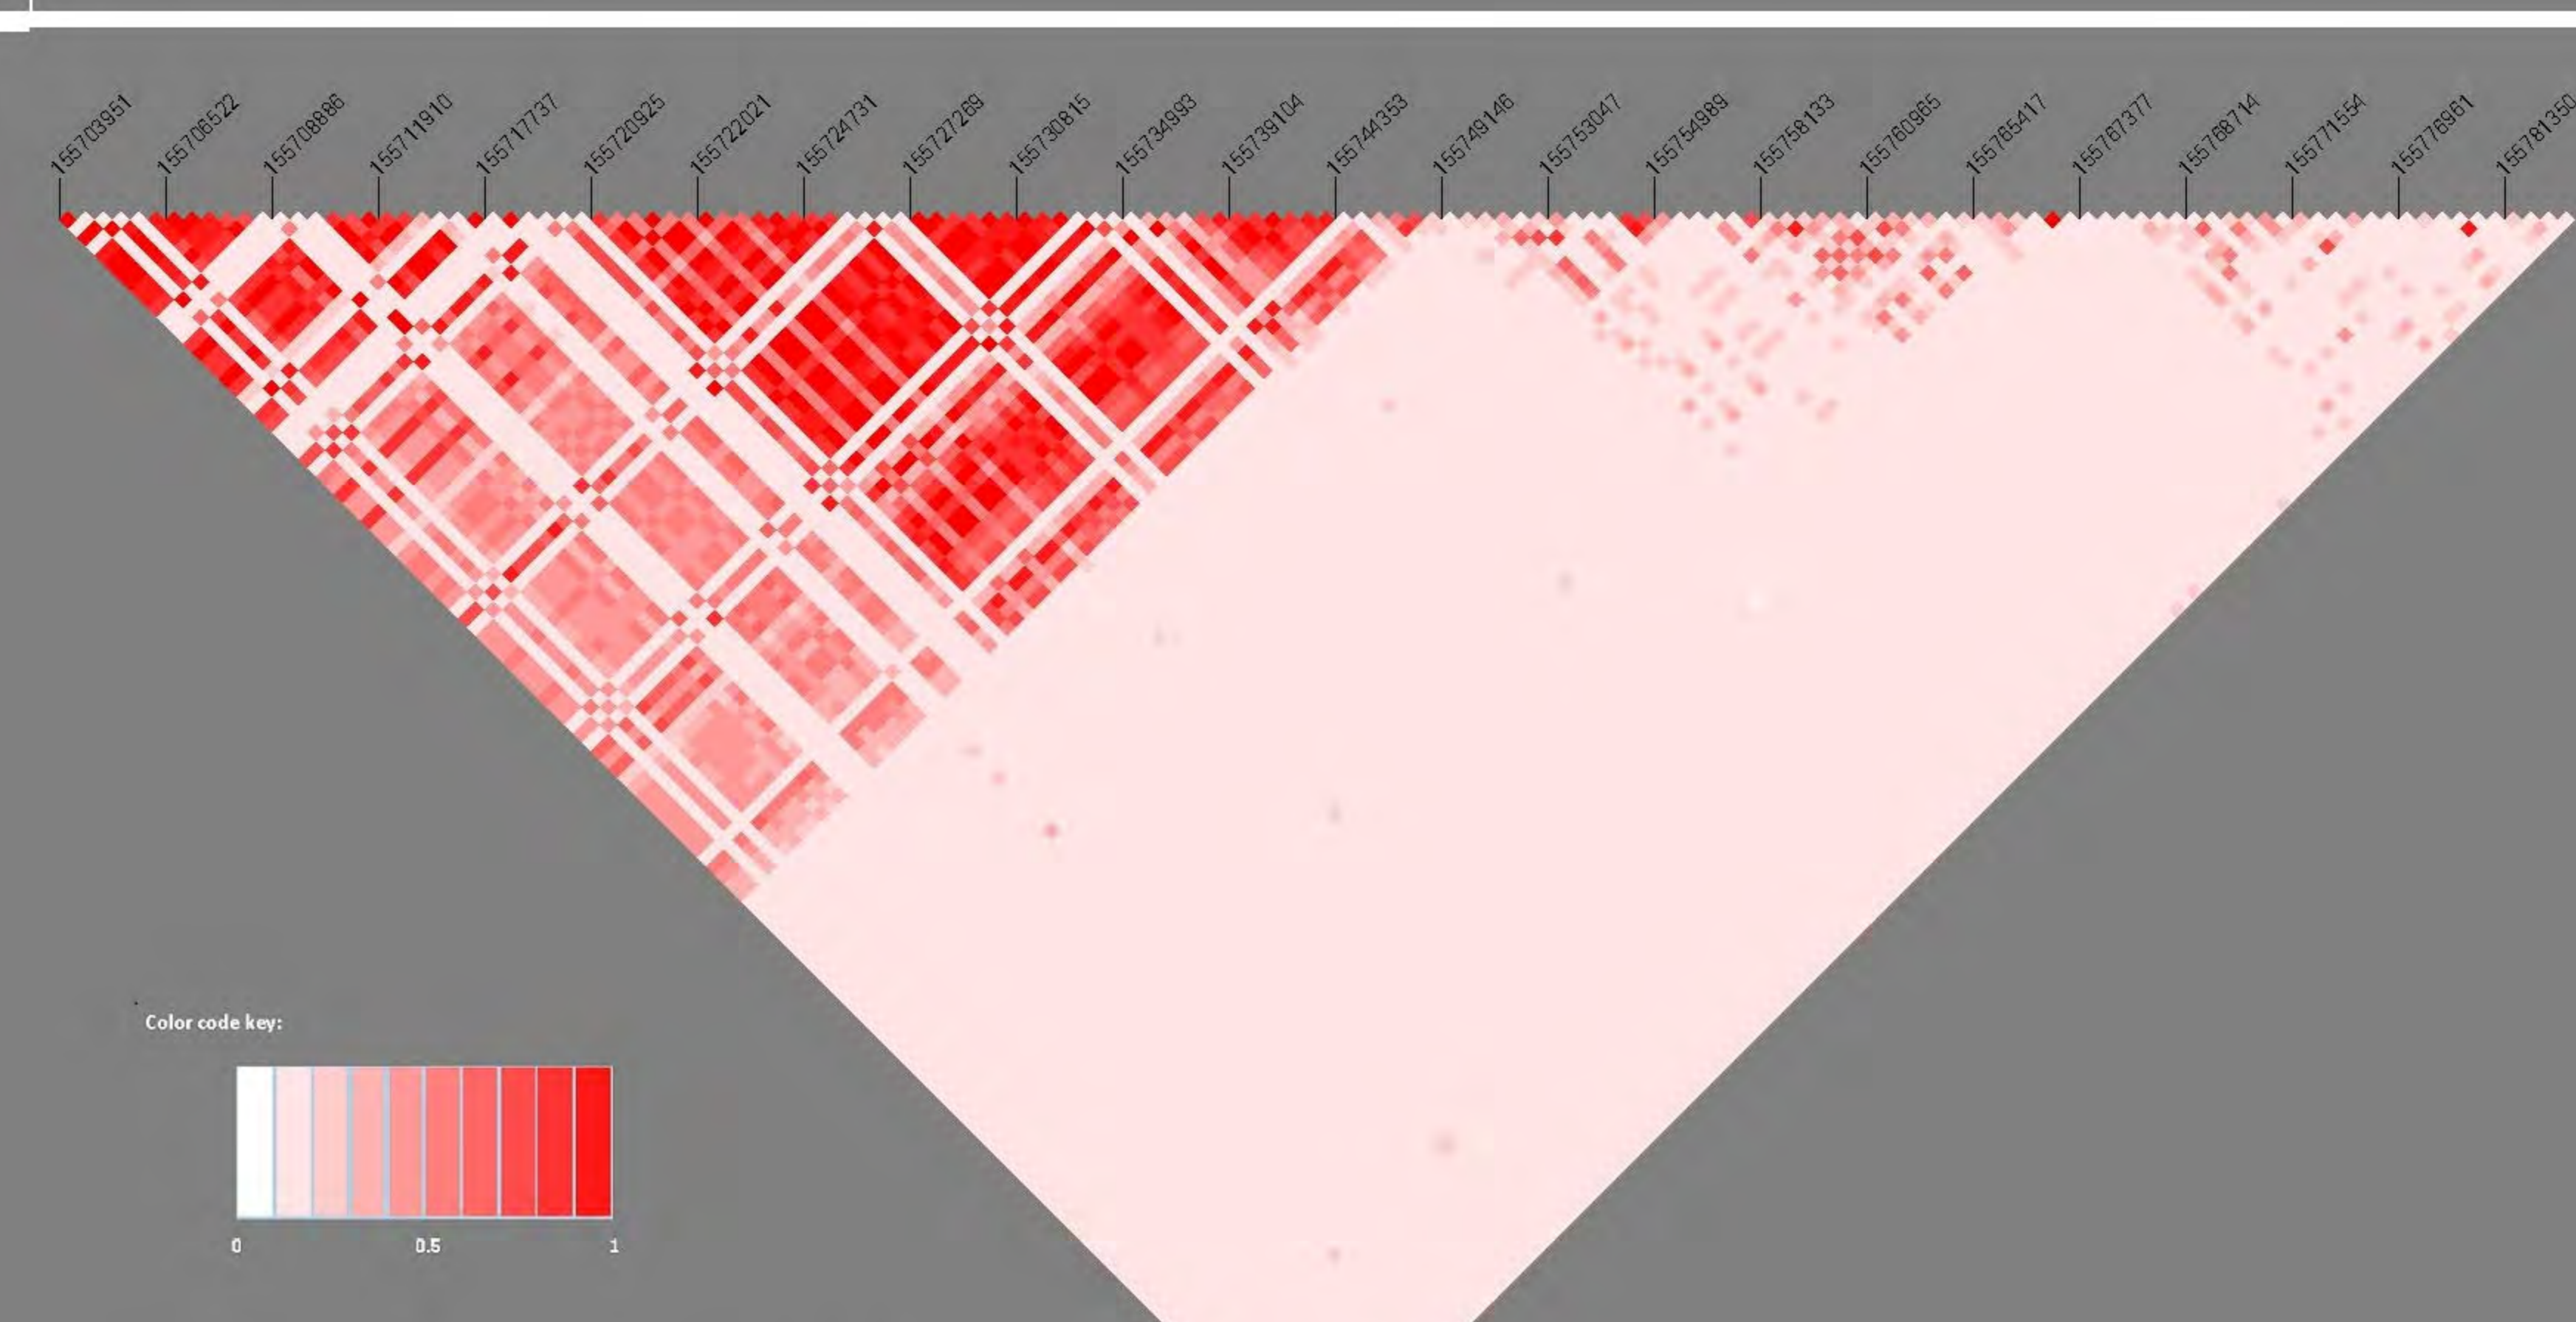

(B1) Y chromosome: PAR1

(B2) Y chromosome: PAR2
